# Supplementary material
Source: HighWire-hosted journal article supplement (http://rc.rcjournal.com/highwire/filestream/28212/field_highwire_adjunct_files/0/rc-11698-File005.docx)
Supplement: rc-11698-File005.docx [file rc-11698-File005.docx]

| Diagnosis | Qualifying ICD-10 or STAR Code |
| --- | --- |
| HA-VTE | I2601, I2609, I2690, I2692, I2693, I2694, I2699, I636, I82210, I82220, I82290, I823, I82401, I82402, I82403, I82409, I82411, I82412, I82413, I82419, I82421, I82422, I82423, I82429, I82431, I82432, I82433, I82439, I82441, I82442, I82443, I82449, I82451, I82452, I82453, I82459, I82461, I82462, I82463, I82469, I82491, I82492, I82493, I82499, I824Y1, I824Y2, I824Y3, I824Y9, I824Z1, I824Z2, I824Z3, I824Z9, I82601, I82602, I82603, I82609, I82621, I82622, I82623, I82629, I82890, I8290, I82A11, I82A12, I82A13, I82A19, I82B11, I82B12, I82B13, I82B19, I82C11, I82C12, I82C13, I82C19 |
| HA-VTE Type - DVT | I82210, I82220, I82290, I82401, I82402, I82403, I82409, I82411, I82412, I82413, I82419, I82421, I82422, I82423, I82429, I82431, I82432, I82433, I82439, I82441, I82442, I82443, I82449, I82451, I82452, I82453, I82459, I82461, I82462, I82463, I82469, I82491, I82492, I82493, I82499, I824Y1, I824Y2, I824Y3, I824Y9, I824Z1, I824Z2, I824Z3, I824Z9, I82601, I82602, I82603, I82609, I82621, I82622, I82623, I82629, I82890, I8290, I82A11, I82A12, I82A13, I82A19, I82B11, I82B12, I82B13, I82B19, I82C11, I82C12, I82C13, I82C19 |
| HA-VTE Type – Upper Extremity DVT | I82210, I82601, I82602, I82603, I82621, I82622, I82623, I82A11, I82A12, I82A13, I82B11, I82B13, I82C11, I82C13 |
| HA-VTE Type – Lower Extremity DVT | I82220, I82401, I82402, I82403, I82409, I82411, I82412, I82413, I82419, I82421, I82422, I82423, I82429, I82431, I82432, I82433, I82439, I82441, I82442, I82443, I82449, I82451, I82452, I82453, I82459, I82461, I82462, I82463, I82469, I82491, I82492, I82493, I82499, I824Y1, I824Y2, I824Y3, I824Y9, I824Z1, I824Z2, I824Z3, I824Z9, I82B12, I82C12 |
| HA-VTE Type – Unspecified Location | I82290, I82609, I82629, I82890, I8290, I82A19, I82B19, I82C19 |
| HA-VTE Type – Organ Specific | I636, I823 |
| HA-VTE Type - PE | I2601, I2609, I2690, I2692, I2693, I2694, I2699 |
| History of Prior VTE | 1169.1, 1169.99, 1169.6, 1169.5, 1169.4, 1169.2, V12.51 |
| Sepsis | 038, 038.0, 038.10, 038.11, 038.12, 038.2, 038.3, 038.4, 038.41, 038.42, 038.43, 038.44, 038.8, 040.82, 054.5, 415.1, 415.12, 415.13, 449, 659.30, 659.31, 659.33, 771.81, 785.52, 785.53, 785.54, 785.59B |
| Obesity | 278.00, 278.01 |
| Hematologic Malignancy | 200, 200.2, 201, 202.7, 204.0, 205.0, 205.1, 208, 238.7, 238.7A |
| Inherited Coagulopathy | ICD-10: E8802 STAR: 270, 272, 286.9, 289.91 |
| Rheumatologic Disease | 446.1, 446.5, 446.7, 710.0, 710.3, 714.3, 716, 717, 720, 797.6 |
| Pulmonary Dysfunction | 136.3, 277.0, 457.8, 466, 466.1, 466.2, 480, 480.1, 480.2, 480.3, 482, 482.42, 482.84, 483, 486, 487, 488, 488.1, 491, 493.82, 493.91, 493.92, 494, 504.0, 505.0, 505.1, 506.0, 507.0, 508.0, 509, 510, 511.5, 511.9, 512, 513, 518.5, 518.6, 518.7, 519.1A, 748.6, 748.9, 768.3, 799.1, 1179.12 |

**Supplemental Table 1.** International Classification of Diseases 10th Revision (ICD-10) codes with corresponding diagnoses. [ICD10: International Classification of Diseases 10th Edition; STAR: System Tracking for Adult and Reimbursement; HA-VTE: hospital acquired venous thromboembolism; DVT: deep venous thrombosis; PE: pulmonary embolism]
